# Supplementary material for: tRNA-derived fragments in T lymphocyte–beta cell crosstalk and in type 1 diabetes pathogenesis in NOD mice
Source: PubMed Central journal article supplement (PMC11446995; doi:10.1007/s00125-024-06207-3), 2024-07-05
Supplement: 125_2024_6207_MOESM1_ESM.pdf [file 125_2024_6207_MOESM1_ESM.pdf]

## SUPPLEMENTARY METHODS

### tRF annotation and classification

tRFs were classified by their positions in the mature tRNA. We defined five structural categories comprising: (a) “5'-tRNA halves” (5'-tRHs) beginning at position +1 (or, -1) of the tRNA and terminating at any of the four underlined positions n1 ∇n2 ∇A1 ∇A2 ∇A3 n3 n4 (each ∇ denotes a reported Angiogenin cleavage site at the anticodon); (b) “3'-tRNA halves” (3'-tRHs) originating from any of the four underlined positions n1 ∇n2 ∇A1 ∇A2 ∇A3 n3 n4 and terminating in the first C, the second C, or the A of the non-templated CCA addition. (c) “5'-tRFs” beginning at the 5' end (+1 or -1) of the tRNA and ending in a position other than n1, n2, A1, or A2. (d) “i-tRFs” (internal tRFs) originating from either position +2 or further to the right and end before the first C of the non-templated CCA addition. (e) “3'-tRFs” beginning at a position other than n2, A1, A2 or A3 and terminating at the first C, the second C, or the A of the non-templated CCA addition.

### RNAseq analysis of pulled-down EU-tagged RNA

The RNA reads analysed have the following structure (from 5'-end to 3'end):

- Captured RNA molecule
- 3' Adapter AACTGTAGGCACCATCAAT
- UMI of 12 nucleotides
- Primer site AGATCGGAAGAGCACACGTCTGAACTCCAGTCAC
- barcode of 6 nucleotides
- P7 capture primer ATCTCGTATGCCGTCTTCTGCTTGA
- poly-A

We wrote a Perl script to analyze those reads, which first locates the 3' Adapter and then extracts the captured RNA molecule sequence (the leading part of the read up to the adapter). The script then locates the Primer site and extracts the 12 nucleotides UMI. Next the script extracts the 6 nucleotide barcode and compares it to the expected barcode(s) for the sample being analyzed. If the 3' Adapter, the Primer site, or the barcode are not recognized, the read is ignored. If the sites and barcode are correctly recognized, the sequence is kept to record the number of different UMIs observed. The final output of the script is a tab-delimited text file listing the count of distinct sequences for each sample. We obtained 13'323'134 sequences, which were filtered to retain only sequences of 16-55 nucleotides length (11'984'754 distinct sequences). These were further filtered to keep only sequences with at least 5 counts in at least 4 samples (63367 distinct sequences). Finally, we retained only sequences that could originate from fragments of the 400 "high confidence" and 7 "notable atypical predictions" tRNA

sequences retrieved from <http://gtrnadb.ucsc.edu/genomes/eukaryota/Mmus39/> or be fragments of the control miR-238 *C. elegans* sequence spiked in each sample. The 253 remaining sequences were analyzed with R (version 4.2.2) and DESeq2 (version 1.38.3; [1]) with default parameters.

Annotated results are provided in ESM Table 5, with samples raw counts, DESeq2 normalized counts, and rlog counts after applying a variance stabilizing transformation (VST) using the `vst` function taking in to account the experimental design (`blind=FALSE`). Foldchange computed by DESeq2 and moderated by the `lfcShrink` function using the `apeglm` [2] shrinkage estimator are also provided in columns `Fold Change` and `Fold Change_apeglm`, respectively.

## References

1. Love, M.I., W. Huber, and S. Anders, *Moderated estimation of fold change and dispersion for RNA-seq data with DESeq2*. *Genome Biol*, 2014. **15**(12): p. 550.
2. Zhu, A., J.G. Ibrahim, and M.I. Love, *Heavy-tailed prior distributions for sequence count data: removing the noise and preserving large differences*. *Bioinformatics*, 2019. **35**(12): p. 2084-2092.

**ESM Table 1****Key resource table**

| <b>REAGENT/RESOURCE</b>                           | <b>REFERENCE OR SOURCE</b> | <b>IDENTIFIER OR CATALOG NUMBER</b> |
|---------------------------------------------------|----------------------------|-------------------------------------|
| <b>ANTIBODIES</b>                                 |                            |                                     |
| APC anti-CD3                                      | BioLegend                  | #100235                             |
| Brilliant Violet 421 anti-CD4                     | BioLegend                  | #100437                             |
| FITC anti-CD45                                    | BioLegend                  | #157213                             |
| PE anti-CD25                                      | BioLegend                  | #100007                             |
| TruStain FcX™ (anti-mouse CD16/32) antibody       | BioLegend                  | #101319                             |
| Goat anti-guinea pig IgG Alexa Fluor 488          | Thermo Fisher Scientific   | #A-11073                            |
| Goat anti-rabbit IgG Alexa Fluor 555              | Thermo Fisher Scientific   | #A-21428                            |
| Guinea pig anti-insulin, polyclonal               | Agilent                    | IR00261-2                           |
| Rabbit anti-caspase-3 (Asp 175)                   | Cell Signaling             | #9661                               |
| <b>CHEMICALS, PEPTIDES AND ENZYMES</b>            |                            |                                     |
| β-Mercaptoethanol                                 | Merck-Sigma                | #M6250                              |
| Bovine serum albumin BSA                          | Merck-Sigma                | #6003                               |
| CD4+ CD25+ Regulatory T Cell Isolation Kit, mouse | Miltenyi Biotec GmbH       | # 130-091-041                       |
| Click-iT Nascent RNA Capture kit                  | Thermo Fischer Scientific  | #C10365                             |
| Collagenase                                       | Merck-Sigma                | #C9263 for mouse islets             |
| DNase                                             | Promega                    | #M6101                              |
| Dulbecco's modified Eagle's medium (DMEM)         | Thermo Fisher Scientific   | #41966                              |
| Dynabeads Mouse T-Activator CD3/CD28 beads        | Thermo Fisher Scientific   | # 11453D                            |
| 5-ethynyl uridine (EU)                            | Baseclick                  | #BCN-003                            |

|                                                             |                           |                                               |              |
|-------------------------------------------------------------|---------------------------|-----------------------------------------------|--------------|
| Fetal bovine serum                                          | Thermo Fisher Scientific  | #2720801                                      |              |
|                                                             | Merck-Sigma               | #F7524                                        |              |
| Fluor-Save mounting medium                                  | Merck-Sigma               | #345789                                       |              |
| Hepes                                                       | Merck-Sigma               | #H3375                                        |              |
| Histopaque density gradient                                 | Merck-Sigma               | #1077 and #1119                               |              |
| Hoechst 33342                                               | Thermo Fisher Scientific  | #H3570                                        |              |
| Interleukin-1 $\beta$ (IL-1 $\beta$ )                       | PeprTech                  | #211-11B                                      |              |
| Interleukin-2, recombinant mouse (IL-2)                     | PeprTech                  | #212-12                                       |              |
| Interleukin-12, recombinant mouse (IL-12)                   | PeprTech                  | #210-12                                       |              |
| Interferon- $\gamma$ (IFN- $\gamma$ )                       | PeprTech                  | #315-05                                       |              |
| Interferon- $\alpha$ (IFN- $\alpha$ )                       | Abcam                     | #ab259386                                     |              |
| Lipofectamine 2000                                          | Thermo Fischer Scientific | #11668019                                     |              |
| miRCURY LNA Universal RT microRNA PCR system                | Qiagen                    | #339340 for RT kit and #339347 for Sybr Green |              |
| M-MLV reverse transcriptase (Promega #M3683)                | Promega                   | #M3683                                        |              |
| miRNeasy micro kit                                          | Qiagen                    | #217084                                       |              |
| miRNeasy mini kit                                           | Qiagen                    | #217004                                       |              |
| Penicillin streptomycin                                     | Thermo Fisher Scientific  | #15140122                                     |              |
| Pyruvate                                                    | Merck-Sigma               | #P2256                                        |              |
| QIAseq miRNA NGS 48 Index IL kit                            | Qiagen                    | #331595                                       |              |
| QIAzol lysis reagent                                        | Qiagen                    | #79306                                        |              |
| Random primers                                              | Promega                   | #C1181                                        |              |
| Roswell Park Memorial Institute (RPMI) 1640 GlutaMAX medium | Thermo Fischer Scientific | #72400-054                                    |              |
| rtStar <sup>TM</sup> tRF&tiRNA Pretreatment kit             | Arraystar                 | #AS-FS-005                                    |              |
| Sodium pyruvate                                             | Merck-Sigma               | #S-8636                                       |              |
| Streptavidin dynabeads                                      | Thermo Fischer Scientific | #M-280<br>11206D                              | Streptavidin |

|                                                                                                   |                           |                |
|---------------------------------------------------------------------------------------------------|---------------------------|----------------|
| SsoAdvanced Universal SYBR Green Supermix                                                         | BioRad                    | #1725274       |
| Sterile saline solution                                                                           | Merck-Sigma               | #C5914         |
| Trypsin                                                                                           | Thermo Fischer Scientific | #15400-054     |
| Tumor Necrosis Factor- $\alpha$ (TNF- $\alpha$ )                                                  | PeptoTech                 | #315-01A       |
| <b>EXPERIMENTAL MODELS</b>                                                                        |                           |                |
| Male C57BL/6NRj (aged 12 weeks)<br>( <i>M. musculus</i> )                                         | Janvier Laboratories      | Non applicable |
| Female NOD.CB-17-Prkdc scid/Rj (aged 4 and 8 weeks)<br>( <i>M. musculus</i> )                     | Charles River             | Non applicable |
| Female NOD.Cg-Tg (TcrabDC2.5, TcrbBDC2.5) 1Doi/DoiJ, HEM (aged 8 weeks)<br>( <i>M. musculus</i> ) | Jackson Laboratory        | Non applicable |
| MIN6B1 ( <i>M. musculus</i> )                                                                     | Janvier Laboratories      | Non applicable |
| <b>SOFTWARES AND INSTRUMENTS</b>                                                                  |                           |                |
| AxioCam MRc5                                                                                      | Zeiss                     | Non applicable |
| Axiovision fluorescence microscope                                                                | Zeiss                     | Non applicable |
| QIAGEN RNA-seq Analysis Portal 4.1                                                                | Qiagen                    | Non applicable |
| Zetasizer Ultra                                                                                   | Malvern Panalytical       | Non applicable |

| <b>Primers used with SsoAdvanced Universal SYBR Green Supermix (Biorad)</b> |               |                         |                         |
|-----------------------------------------------------------------------------|---------------|-------------------------|-------------------------|
| Species                                                                     | Targets       | Forward primers (5'-3') | Reverse primers (5'-3') |
| Mus<br>Musculus                                                             | <i>Bcl2l1</i> | TAAACTGGGGTTCGCATTGTG   | AGGTAAGTGGCCATCCAAGC    |
|                                                                             | <i>Ccl-2</i>  | AGGTGTCCCAAAGAAGCTGT    | ACAGAAGTGCTTGAGGTGGT    |

## Checklist for reporting human islet preparations used in research

Adapted from Hart NJ, Powers AC (2018) Progress, challenges, and suggestions for using human islets to understand islet biology and human diabetes. Diabetologia <https://doi.org/10.1007/s00125-018-4772-2>

| Islet preparation                                                           | 1               | 2               | 3               | 4          | 5          | 6      | 7           | 8 <sup>a</sup>  |
|-----------------------------------------------------------------------------|-----------------|-----------------|-----------------|------------|------------|--------|-------------|-----------------|
| <b>MANDATORY INFORMATION</b>                                                |                 |                 |                 |            |            |        |             |                 |
| Unique identifier                                                           | HI9             | HI12            | HI7             | N/A        | N/A        | H1046  | HP-18157-01 | HI14            |
| Donor age (years)                                                           | 59              | 60              | 54              | 53         | 39         | 50     | 43          | 47              |
| Donor sex (M/F)                                                             | F               | F               | M               | M          | F          | M      | F           | F               |
| Donor BMI (kg/m <sup>2</sup> )                                              | 23.7            | 22.2            | 28.5            | 27.2       | 31.4       | 19.6   | 34.0        | 33.4            |
| Donor HbA <sub>1c</sub> or other measure of blood glucose control           | -               | -               | -               | -          | -          | -      | 4.6         | -               |
| Origin/source of islets <sup>b</sup>                                        | ECIT            | ECIT            | ECIT            | CEED       | CEED       | ECIT   | Tet-Bio     | ECIT            |
| Islet isolation centre                                                      | Geneva          | Geneva          | Geneva          | Strasbourg | Strasbourg | Geneva |             | Geneva          |
| Donor history of diabetes?<br>Please select yes/no from drop down list      | No              | No              | No              | No         | No         | No     | No          | No              |
| <b>If Yes, complete the next two lines if this information is available</b> |                 |                 |                 |            |            |        |             |                 |
| Diabetes duration (years)                                                   |                 |                 |                 |            |            |        |             |                 |
| Glucose-lowering therapy at time of death <sup>c</sup>                      |                 |                 |                 |            |            |        |             |                 |
| <b>RECOMMENDED INFORMATION</b>                                              |                 |                 |                 |            |            |        |             |                 |
| Donor cause of death                                                        | Cerebral trauma | Cerebral trauma | Cerebral trauma |            |            | Stroke | Stroke      | Cerebral trauma |
| Warm ischaemia time (h)                                                     |                 |                 |                 |            |            |        |             |                 |
| Cold ischaemia time (h)                                                     | 7h39            | 7h30            | 3h20            |            |            | 5h30   |             | 3h20            |

|                                                                                   |        |        |        |        |        |        |        |        |
|-----------------------------------------------------------------------------------|--------|--------|--------|--------|--------|--------|--------|--------|
| Estimated purity (%)                                                              | 84     | 94     | 60     | 80     | 70     | 80     | 90     | 88     |
| Estimated viability (%)                                                           | 90     | 90     | 89     | 90     | 80     | 95     | 95     | 90     |
| Total culture time (h) <sup>d</sup>                                               | 9 days | 8 days | 8 days | 6 days | 6 days | 7 days | 8 days | 6 days |
| Glucose-stimulated insulin secretion or other functional measurement <sup>e</sup> |        |        |        |        |        |        |        |        |
| Handpicked to purity?<br>Please select yes/no from drop down list                 |        |        |        |        |        |        |        |        |
| Additional notes                                                                  |        |        |        |        |        |        |        |        |

<sup>a</sup>If you have used more than eight islet preparations, please complete additional forms as necessary

<sup>b</sup>For example, IIDP, ECIT, Alberta IsletCore

<sup>c</sup>Please specify the therapy/therapies

<sup>d</sup>Time of islet culture at the isolation centre, during shipment and at the receiving laboratory

<sup>e</sup>Please specify the test and the results





|                                                                                   |  |  |  |  |  |  |  |  |
|-----------------------------------------------------------------------------------|--|--|--|--|--|--|--|--|
| Estimated purity (%)                                                              |  |  |  |  |  |  |  |  |
| Estimated viability (%)                                                           |  |  |  |  |  |  |  |  |
| Total culture time (h) <sup>d</sup>                                               |  |  |  |  |  |  |  |  |
| Glucose-stimulated insulin secretion or other functional measurement <sup>e</sup> |  |  |  |  |  |  |  |  |
| Handpicked to purity?<br>Please select yes/no from drop down list                 |  |  |  |  |  |  |  |  |
| Additional notes                                                                  |  |  |  |  |  |  |  |  |

<sup>a</sup>If you have used more than eight islet preparations, please complete additional forms as necessary

<sup>b</sup>For example, IIDP, ECIT, Alberta IsletCore

<sup>c</sup>Please specify the therapy/therapies

<sup>d</sup>Time of islet culture at the isolation centre, during shipment and at the receiving laboratory

<sup>e</sup>Please specify the test and the results

NOD mice 4 weeks

NOD mice 8 weeks

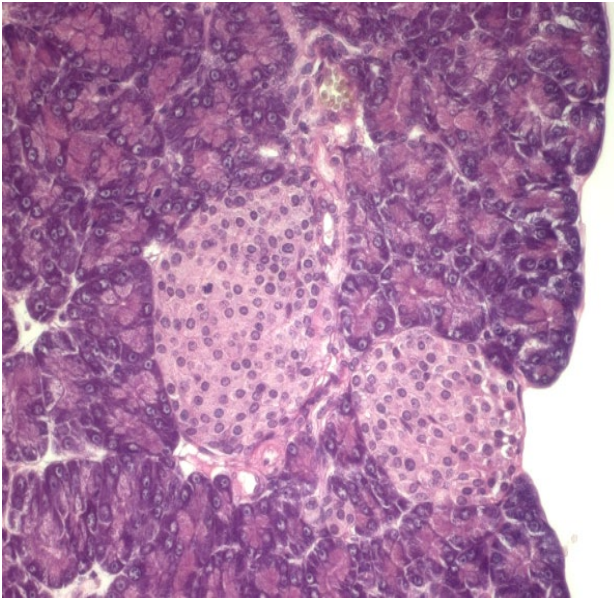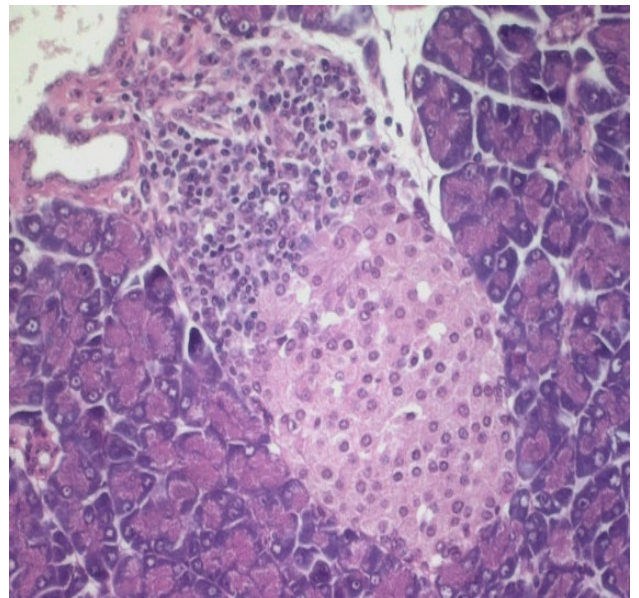

**ESM Figure 1: Pancreatic insulitis in prediabetic NOD mice.** Pancreatic slices of 4 and 8 week-old female NOD mice were stained by hematoxylin-eosin.

mt-Gly-TCC-i

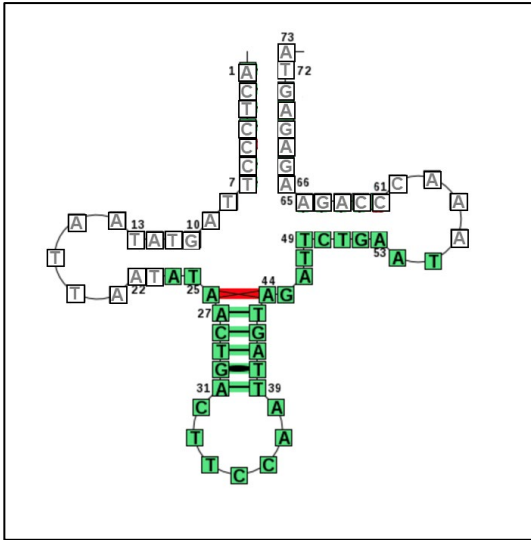

mt-Ser-GCT-5'H

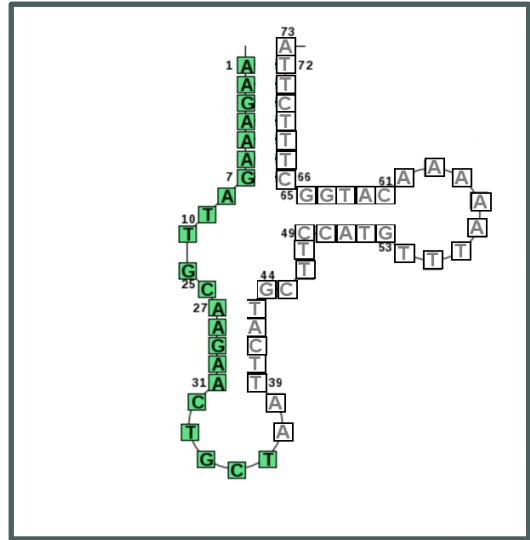

mt-Met-CAT-i

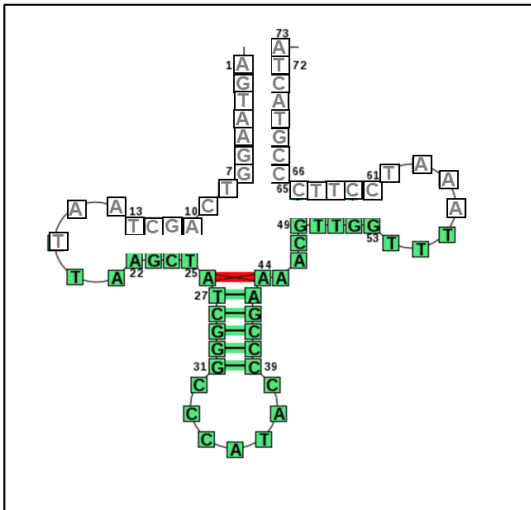

mt-Gln-TTG-5'H

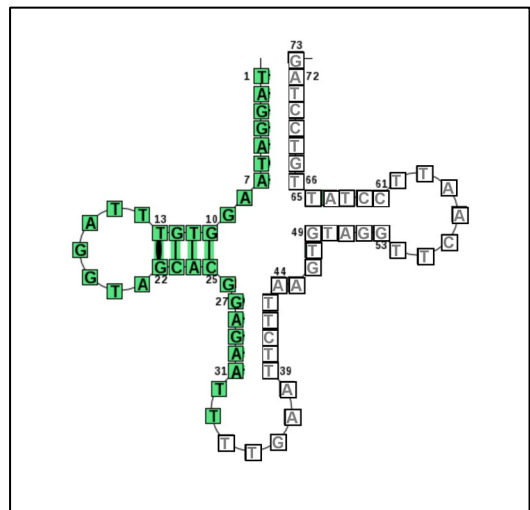

**ESM Figure 2A: Selected mitochondrial tRNA-derived fragments displaying changes in NOD islets during insulinitis.** The selected tRFs are aligned to the secondary structure of the tRNAs of origin. The indicated tRFs represent the sequences amplified by qPCR in Fig. 1C.

Adapted from : <http://mtrna.bioinf.uni-leipzig.de/>

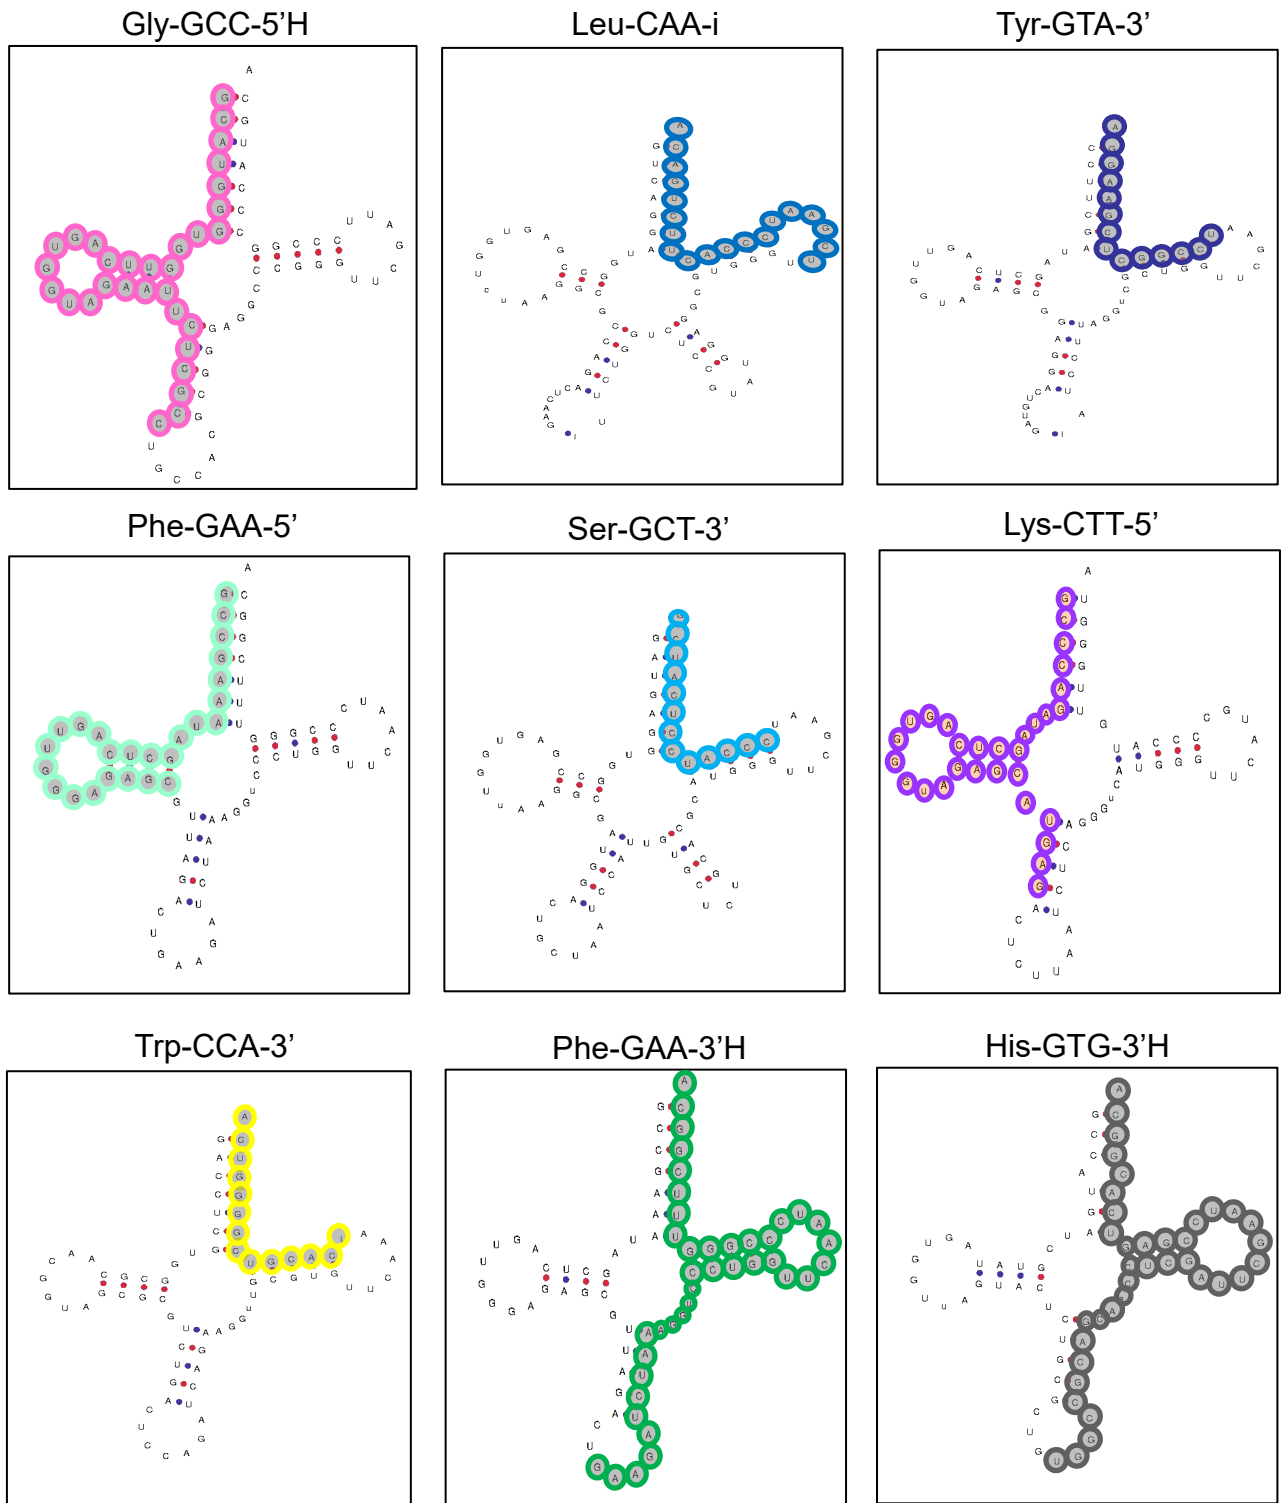

**ESM Figure 2B: Selected genomic tRNA-derived fragments displaying changes in NOD islets during insulinitis.** The selected tRFs are aligned to the secondary structure of the tRNAs of origin. The indicated tRFs represent the sequences amplified by qPCR in Fig. 1C.

Adapted from: <http://gtrnadb.ucsc.edu/genomes/eukaryota/Mmusc10/Mmusc10-displayed-gene-list.html>

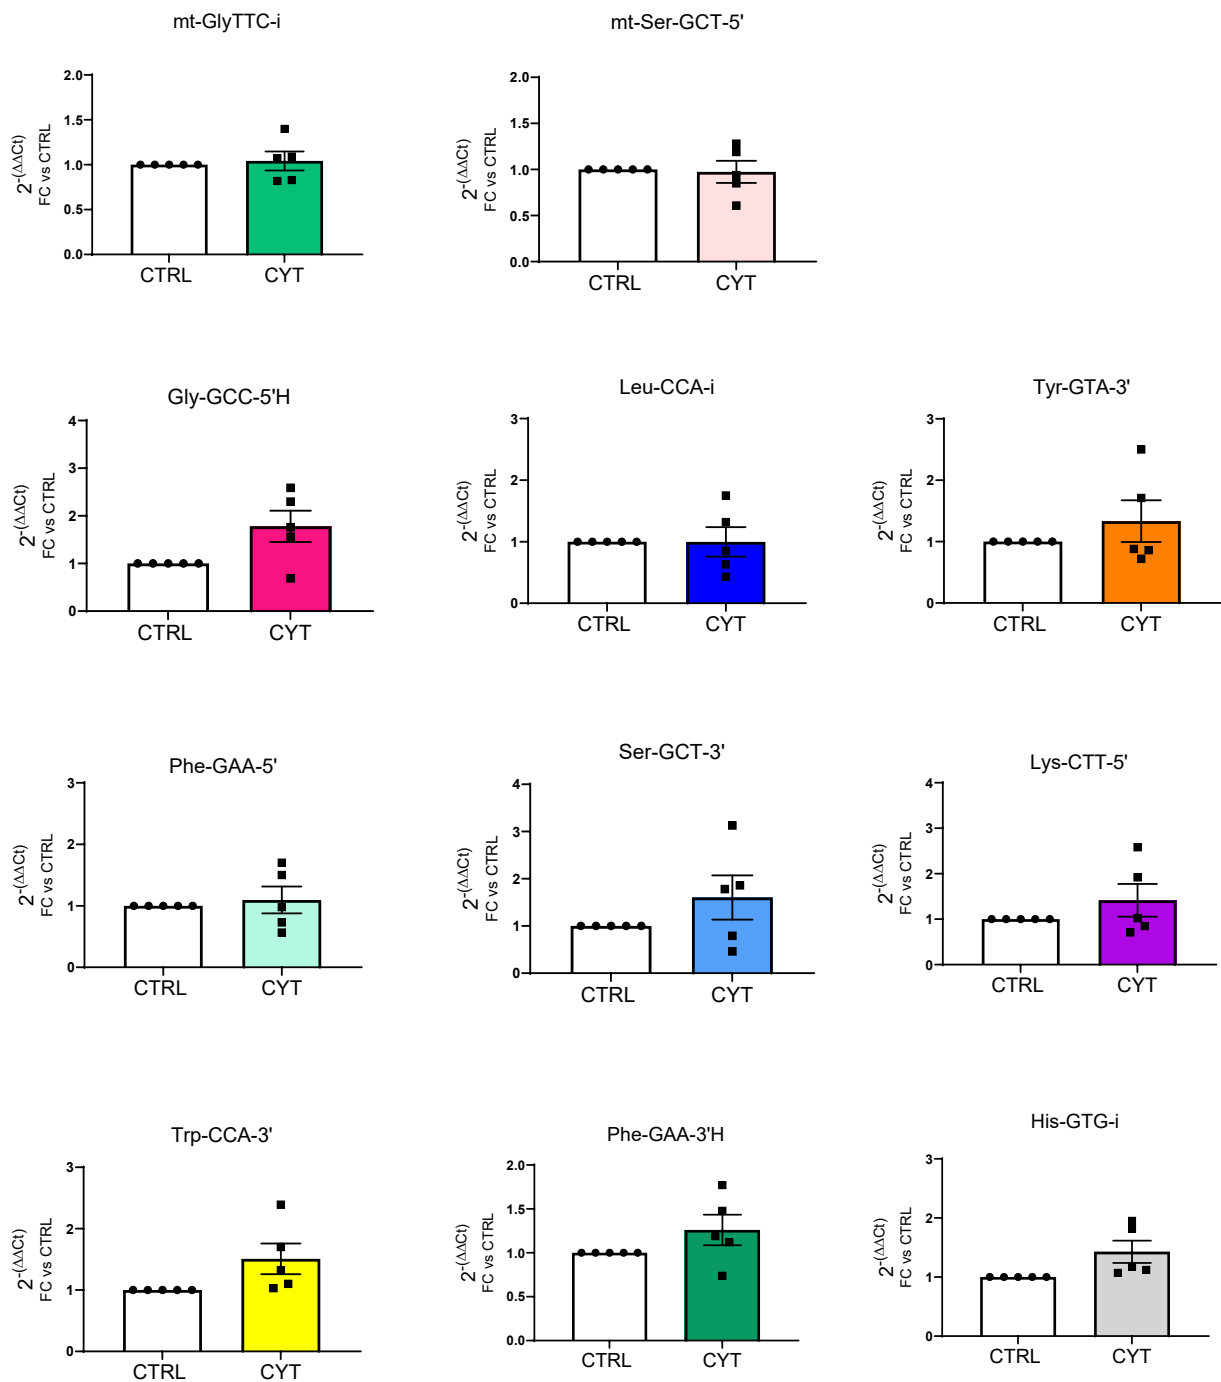

**ESM Figure 3: Effect of proinflammatory on human tRFs.** Human islet cells were incubated in the absence (Ctrl) or in the presence of a mix of cytokines (IL-1 $\beta$ , IFN- $\gamma$  and TNF- $\alpha$ ) for 24h. The level of the indicated tRFs determined by RT-qPCR. The data are shown as fold changes vs CTRL (n = 5). The level of human mt-Met-CAT was below detection limit and is not presented.

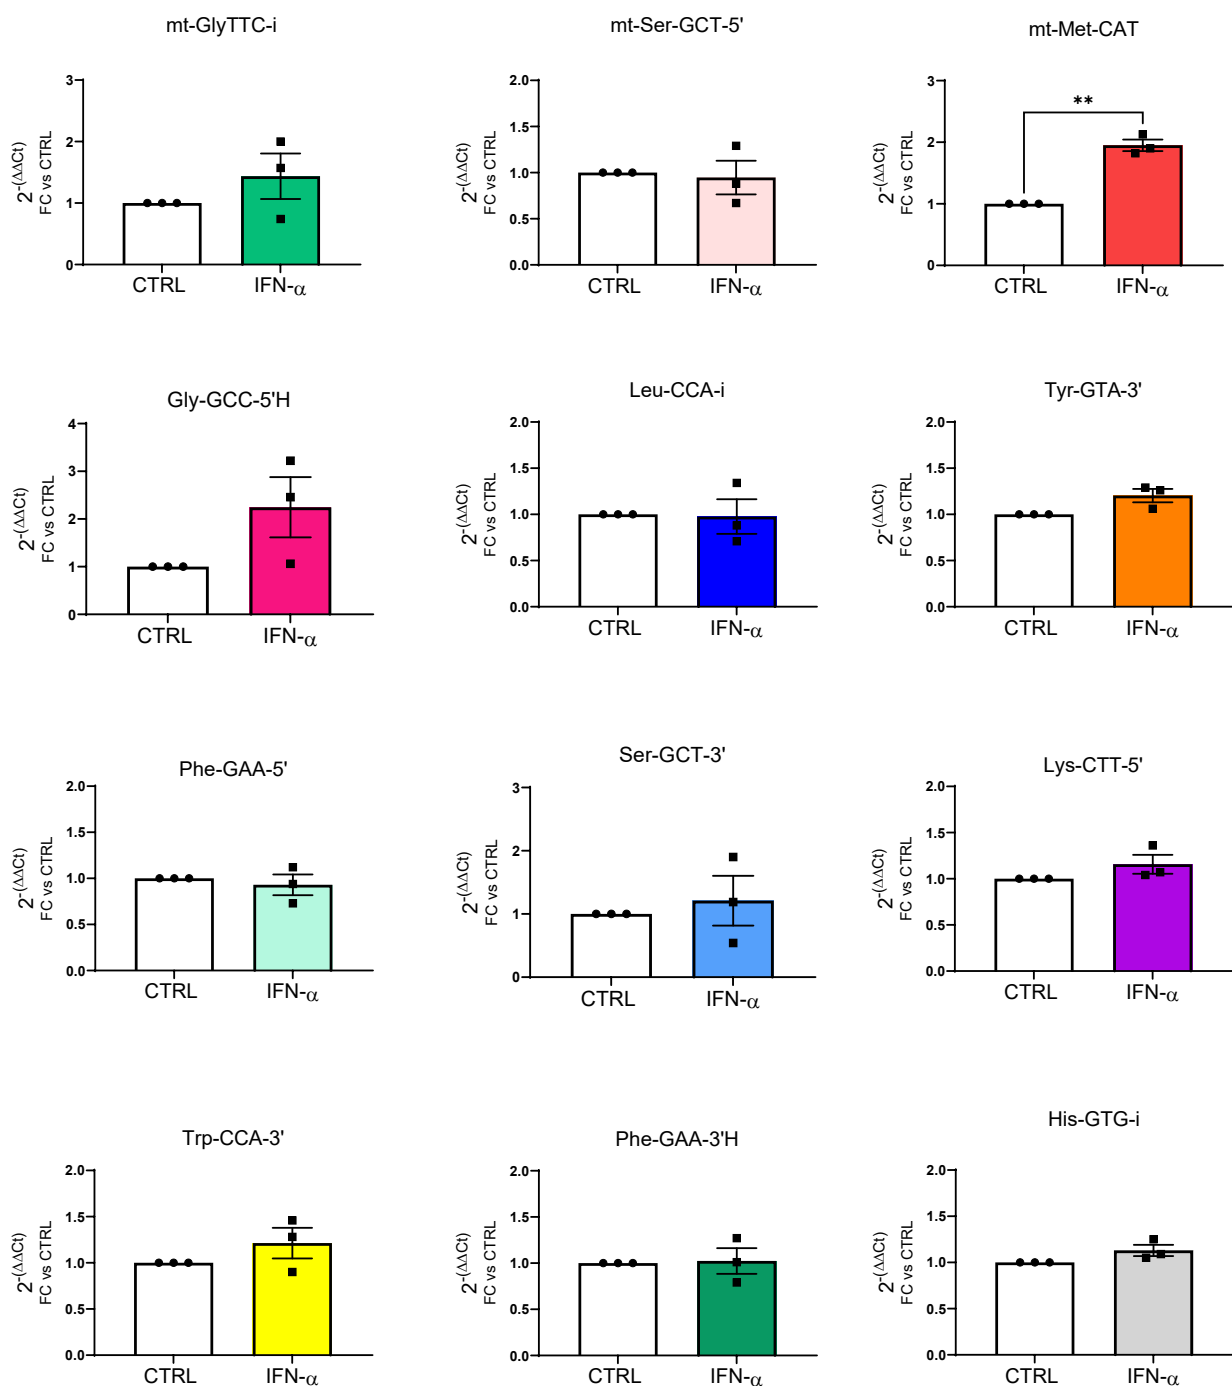

**ESM Figure 4: Effect of IFN $\alpha$  on the level of the indicated tRFs.** Mouse pancreatic islets were incubated for 24h in the presence or the absence of IFN $\alpha$ . The level of the indicated tRFs was assessed by RT-qPCR. The data are shown as fold changes vs control (n = 3). \*\*p < 0.01, Ratio Paired t-test.

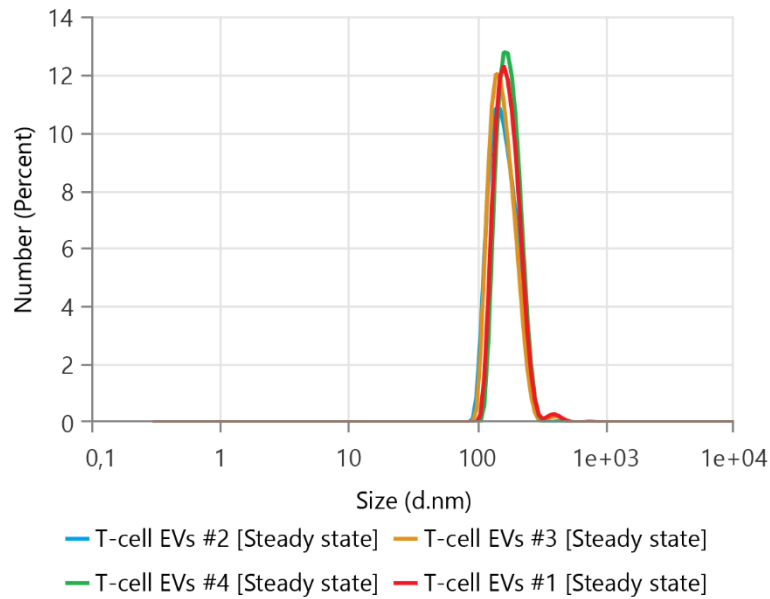

NOD T-cell EVs analyzed on Zetasizer  
 Summary of the size (main peak)

|        | Mean (nm) | Min (nm) | Max (nm) |
|--------|-----------|----------|----------|
| EVs #1 | 162       | 99       | 325      |
| EVs #2 | 151       | 93       | 305      |
| EVs #3 | 141       | 86       | 303      |
| EVs #4 | 165       | 106      | 326      |

**ESM Figure 5: Characterization of the extracellular vesicles of CD4<sup>+</sup> T cells of NOD mice.** Extracellular vesicles were isolated from the culture media of CD4<sup>+</sup> T cells from NOD mice by sequential centrifugations as described in the methods. Vesicle size of four different preparations was assessed by Zetasizer.

A

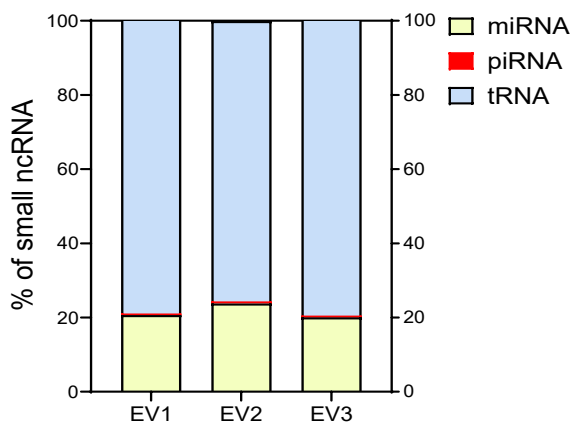

B

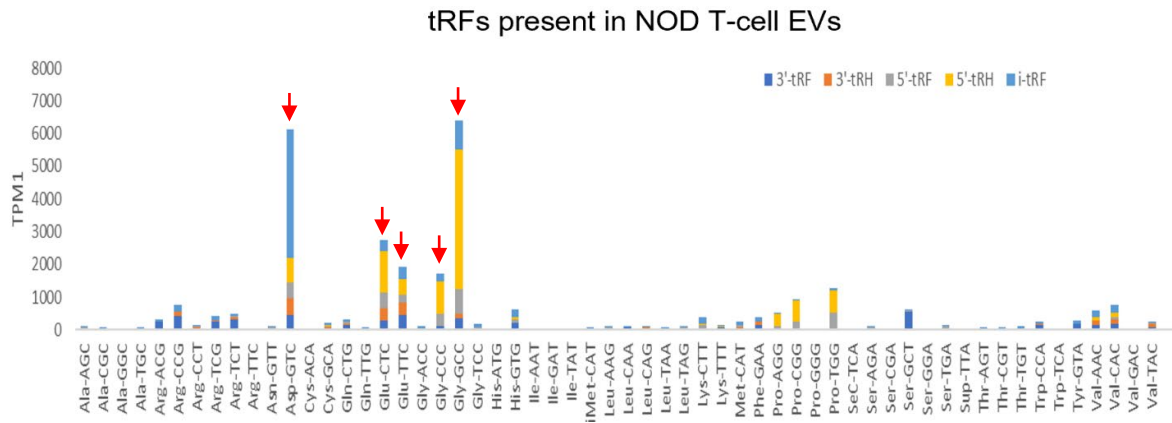

C

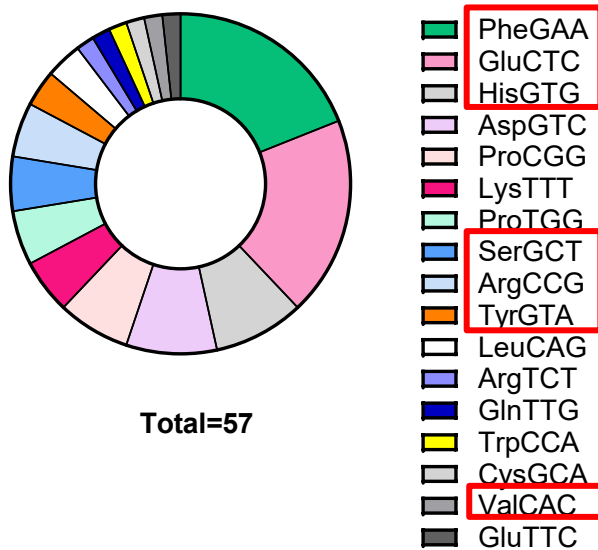

**ESM Figure 6. T-cell EVs contain tRFs that are transferred to islet cells, modifying their tRFs pool.** (A) Stacked bar graph representing the small RNA profile of EVs produced by activated CD4<sup>+</sup>/CD25<sup>-</sup> T-cells. Three individual experiments are represented. (B) Stacked plot describing the accumulation for five categories of tRFs (3'-tRF, 3'-tRH, 5'-tRF, 5'-tRH and i-tRF) originating from the same isodecoder tRNA. The average of TPM1 value and SD of the 3 exosomal samples were used. Red arrows indicate the five most abundant isodecoders. (C) Donut graph grouping the up-regulated tRFs in EV-treated mouse islet cells based on the isodecoder tRNA of origin. tRFs up-regulated in the islets of 8 weeks old NOD mouse are highlighted by red squares.



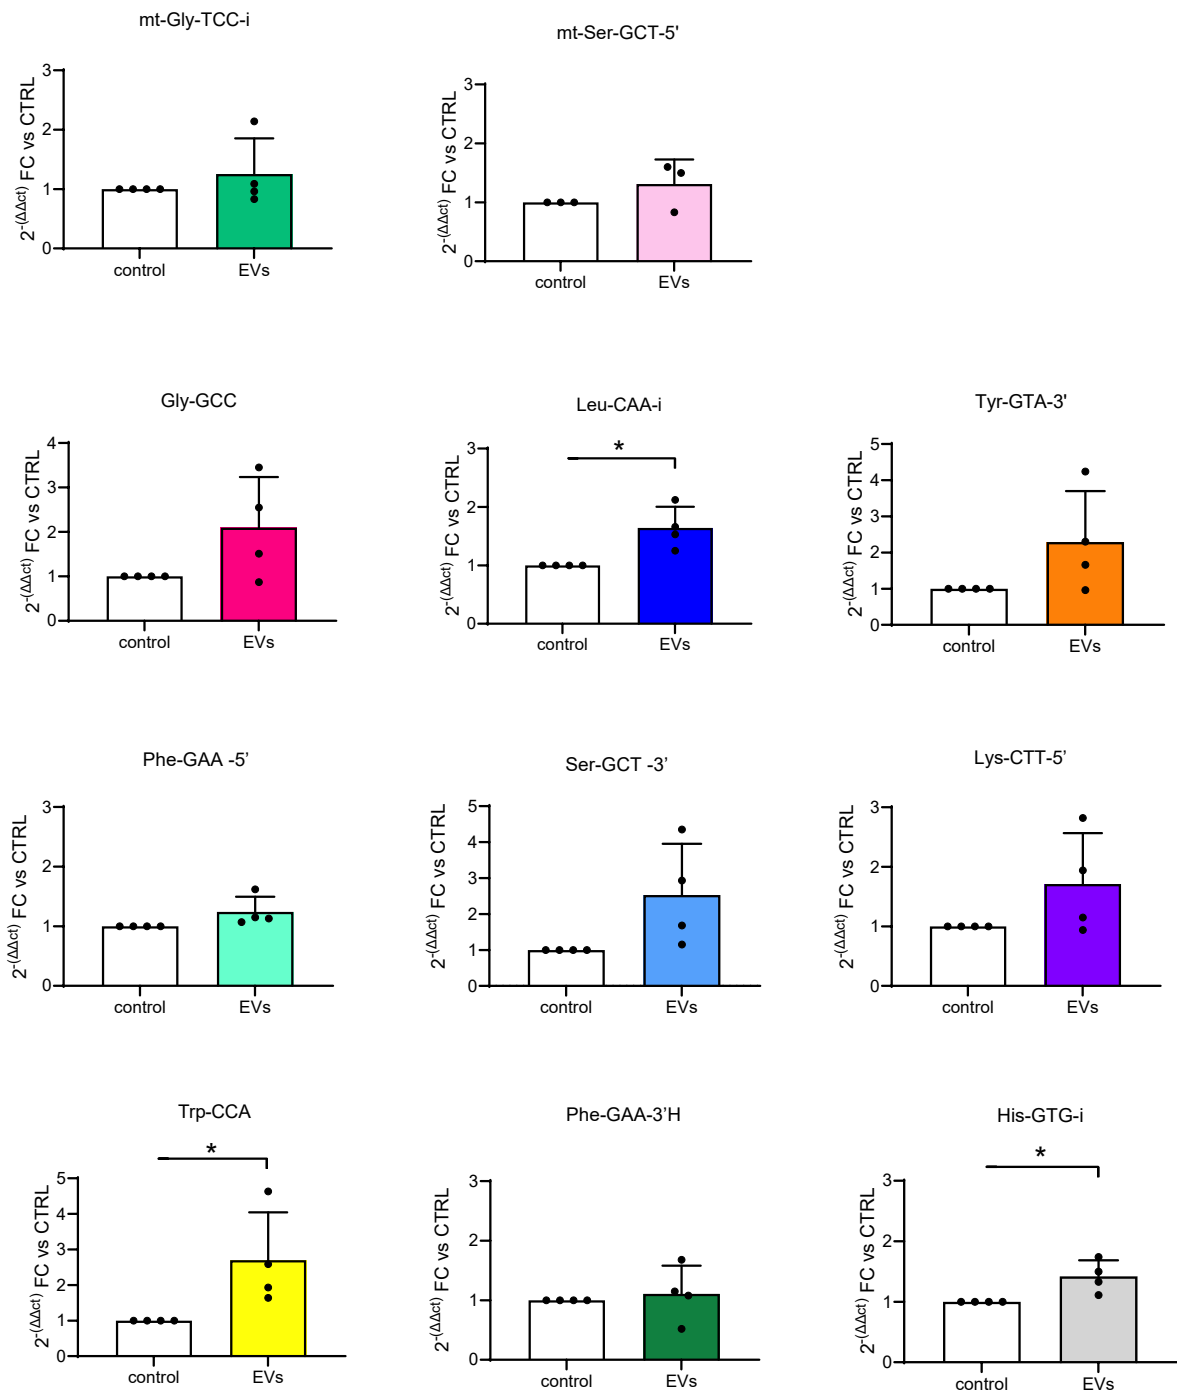

**ESM Figure 7: EV-mediated transfer of tRFs from human CD4<sup>+</sup> T cells to human islet cells.** Human islet cells were incubated for 72h in the absence (control) or in the presence of EVs released from human CD4<sup>+</sup> T lymphocytes. The samples previously used to assess the transfer of microRNAs (Guay et al. Cell metabolism 29, 348-361.e6, 2019) were analyzed to verify the transfer of tRFs. The level of the indicated tRFs was determined by RT-qPCR. The data are shown as fold changes vs control (n = 3-4). \* $p < 0.05$ , Ratio Paired t-test. The level of human mt-Met-CAT was below detection limit and is not presented.

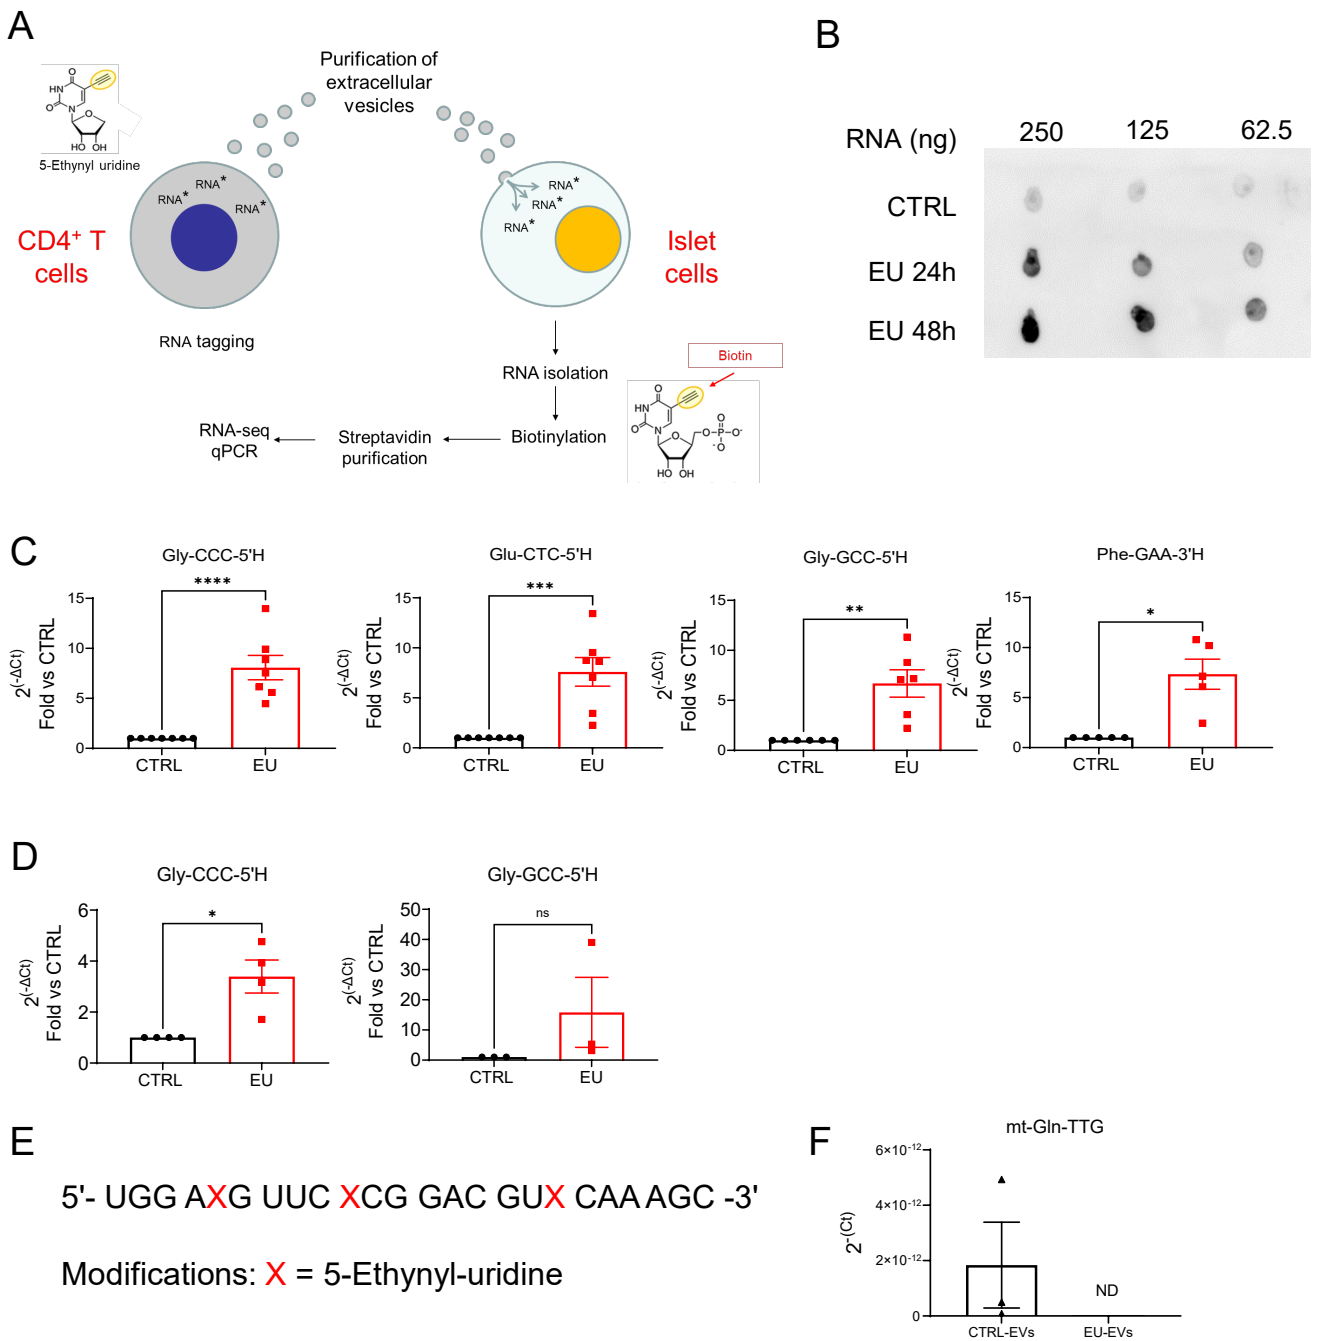

**ESM Figure 8. T-cell RNA tagging with Ethynyl Uridine.** (A) Schematic representation of the RNA-tagging approach: 5-Ethynyl Uridine (EU) is added to the culture medium at the concentration of 200  $\mu$ M. Inside the cells, EU is converted in 5-Ethynyluracile mono phosphate and incorporated into nascent RNA. EU-tagged small non-coding RNAs (RNA\*) are packaged into vesicles that are released in the extracellular space and captured by recipient cells ( $\beta$ -cells). EU-tagged RNA transferred to  $\beta$ -cells can be biotinylated, pulled-down using streptavidin beads and detected by qPCR or RNA-sequencing. (B) Dot-blot membrane loaded with biotinylated RNA from T-cells incubated with or without (CTRL) 200  $\mu$ M EU for 24h (EU 24h), 48h (EU 48h). Different amounts of RNA were loaded, as indicated. (C) qPCR of the RNA recovered on streptavidin beads from EU-treated (EU) and untreated (CTRL) T-cells. (D). EVs were isolated from EU-treated (EU) and untreated (CTRL) T-cells. The tagged RNA present in the EVs was purified on streptavidin beads and analyzed by Real-time PCR. Values are expressed in FC vs CTRL. (n =3-7). \*p < 0.05, \*\*p < 0.01, \*\*\*p < 0.001, and \*\*\*\*p < 0.0001 Ratio Paired T-test. (E) Sequence of the EU-containing spike-in oligonucleotide derived from *C. elegans* miR-238. (F) Mouse islet cells were incubated with T-cell EVs from untreated (CTRL) and EU-treated (EU) T-cells. RNA was extracted after 24h, biotinylated, purified on streptavidin beads and the level of mt-Gln-TTG analyzed by qPCR.

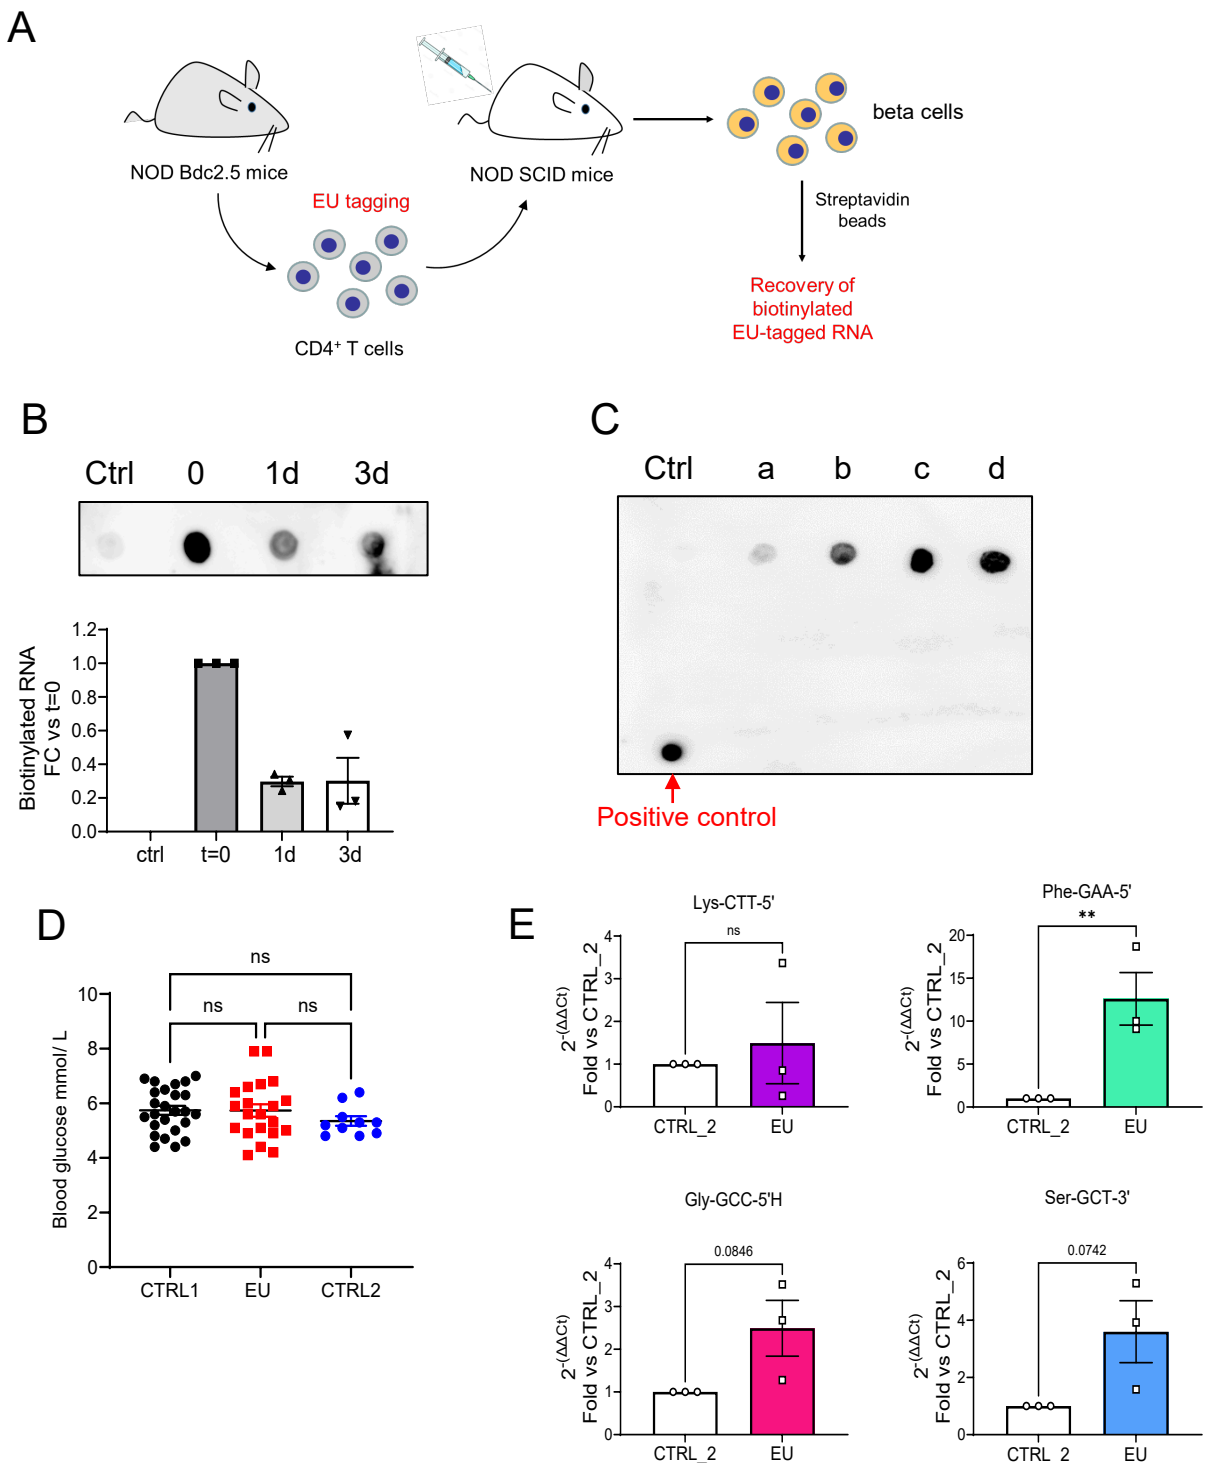

**ESM Figure 9. tRFs directly transferred from CD4<sup>+</sup>/CD25<sup>-</sup> T-cells during autoimmune diabetes. (A)** Schematic representation of the in vivo tagging approach. **(B)** Dot-blot analysis and quantification of total EU-RNA present in CD4<sup>+</sup>/CD25<sup>-</sup> T-cells after a 48h-pulse with 200  $\mu$ M EU and in control conditions W/O EU (Ctrl). After EU incubation (t=0), the cells were washed, plated in fresh medium without EU, and RNA was collected at several time points as indicated (n=3). **(C)** Dot blot of EU-tagged RNA in NOD.BDC2.5 T-cells before injection in NOD.SCID mice (n=4). Ctrl= NOD.BDC2.5 T-cells not treated with EU. In lane «a» the amount loaded was 1/4 compared to the other replicates (Ctrl, b, c, and d). A biotinylated RNA was spotted as a positive control (red arrow). **(D)** Glycemia measured on recipient NOD.SCID mice 48h after the injection of NOD.BDC2.5 T-cells. Mice were injected with saline solution (CTRL\_1), with untreated T-cells (CTRL\_2) and with EU-treated T-cells (EU). **(E)** Real-time PCR on the pull-down from FACS-sorted  $\beta$ -cells from NOD.SCID injected with EU-tagged T-cells (EU), compared to  $\beta$ -cells from NOD.SCID mice injected with not-treated T-cells (CTRL\_2). EU-containing spiked-in *C. elegans* miR-238 was used to normalize the data (n=4). \*\*p < 0.01 by two-tailed unpaired t test.

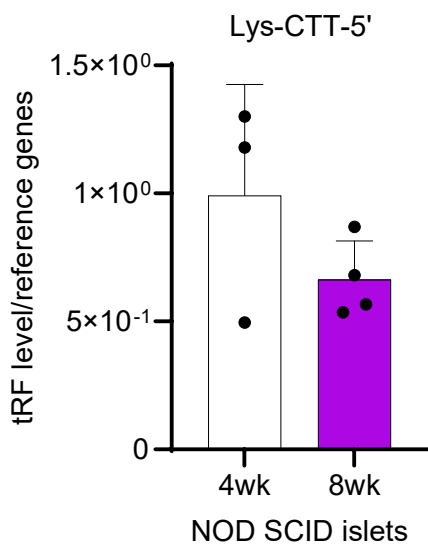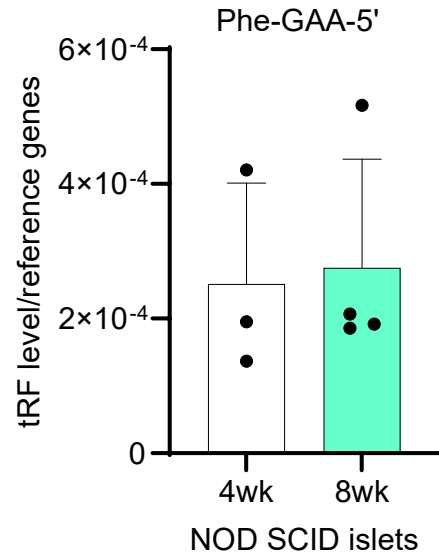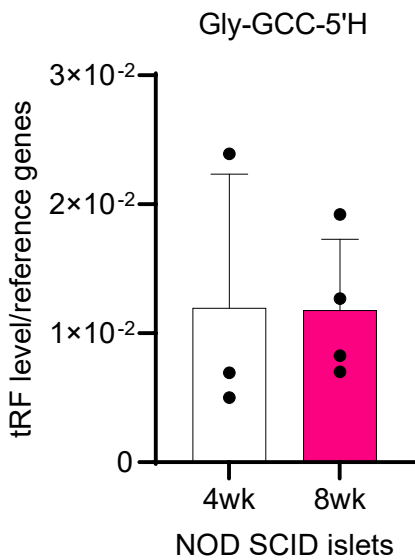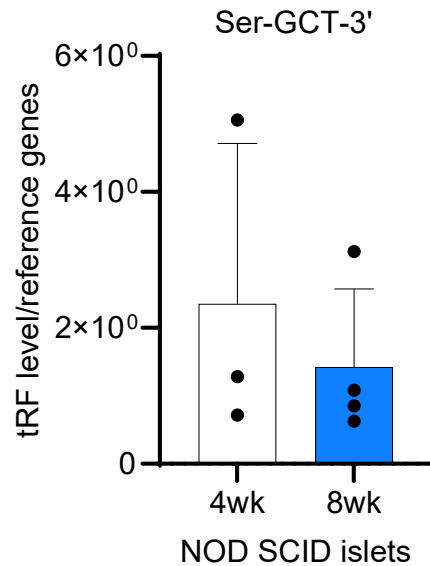

**ESM Figure 10. Level of selected tRFs in the islets of NOD-SCID mice.** The level of the indicated tRFs in the pancreatic islets of 4 and 8 weeks-old NOD SCID mice was measured by RT-PCR and was normalized to two reference small RNAs, Let7a and Let7f. Each point corresponds to a pool of the islets of 6 mice for 4 weeks-old animals and a pool of the islets of 3 mice for 8 weeks-old animals.

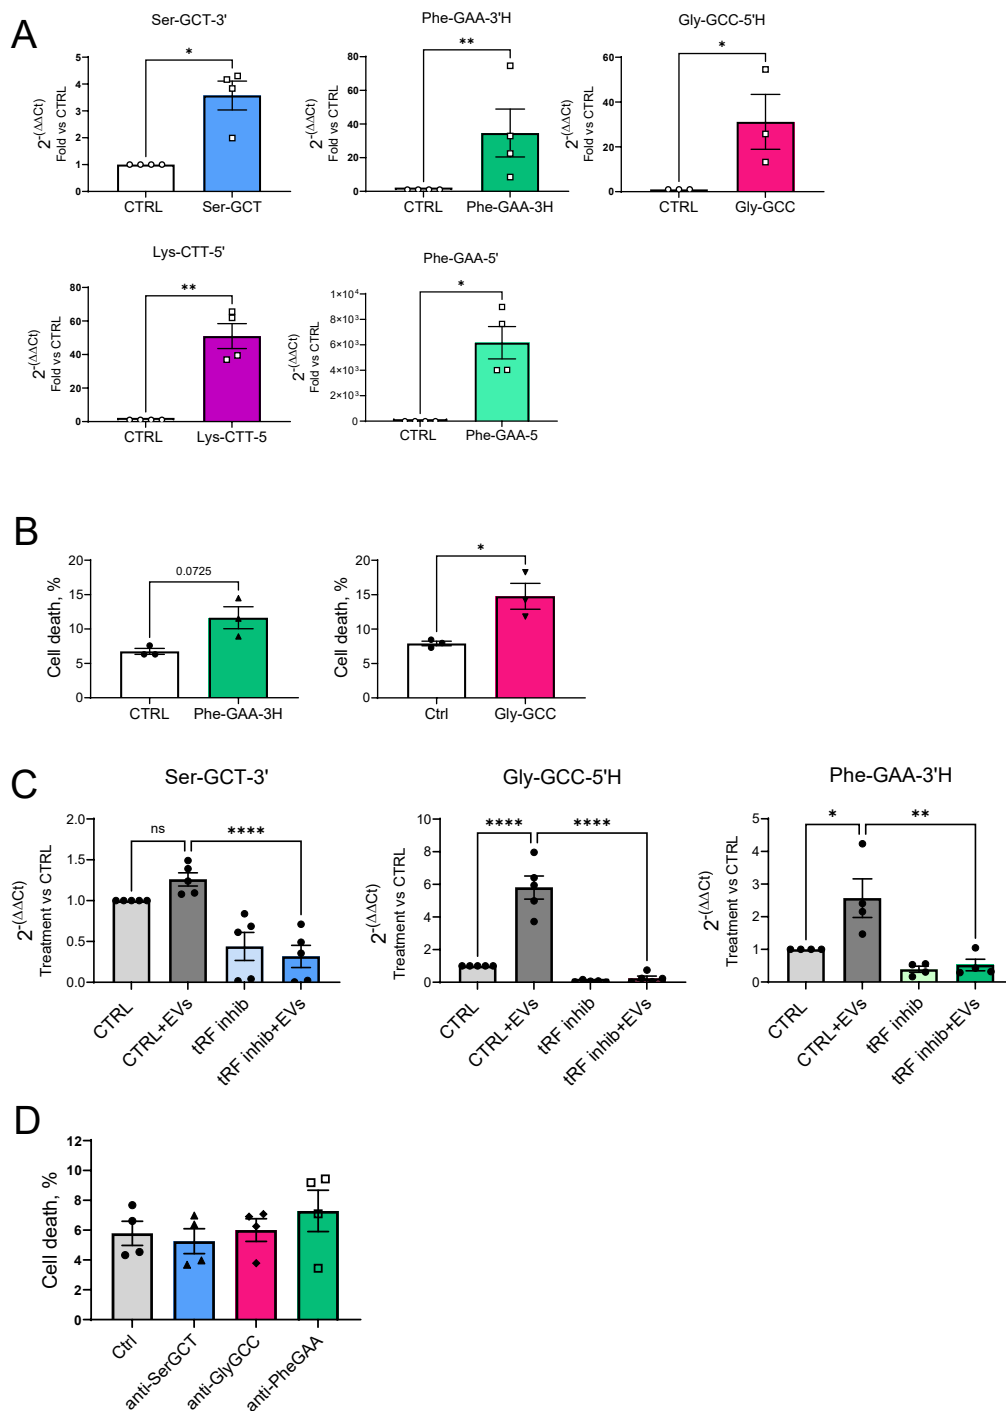

**ESM Figure 11. Overexpression and inhibition of selected tRFs affects  $\beta$ -cell apoptosis.** (A and B) Mouse islet  $\beta$ -cells were transfected with the indicated tRF mimics or a scramble sequence (CTRL). After 48h RNA was collected and tRF expression measured by qPCR (A). Islet cell death was assessed by scoring the cells displaying pycnotic nuclei upon Hoechst/ Propidium Iodate staining (B). (A and B) \*  $p < 0.05$ , \*\*  $p < 0.01$ , Ratio paired T-test. (C) Mouse islet cells were transfected with the indicated tRF inhibitors or a negative control (CTRL). After 24h, the cells were incubated with (EVs) or without (CTRL) T-cell EVs for 48h. RNA was collected and tRF expression measured by qPCR. (D) Mouse islet cells were transfected with a negative control inhibitor (Ctrl) or with the indicated tRF inhibitors. Islet cell death was assessed by scoring the cells displaying pycnotic nuclei upon (H/PI) staining (around 5000 cells were counted per condition). (C and D) \*  $p < 0.05$ , \*\*  $p < 0.01$ , \*\*\*\*  $p < 0.0001$ , One-way Anova,  $n=4-5$ .
